# Supplementary material for: Time trend of pancreatic cancer mortality in the Western Pacific Region: age-period-cohort analysis from 1990 to 2019 and forecasting for 2044
Source: PubMed Central journal article supplement (PMC10506228; doi:10.1186/s12885-023-11369-1), 2023-09-18
Supplement: 12885_2023_11369_MOESM2_ESM.pdf [file 12885_2023_11369_MOESM2_ESM.pdf]

## Additional File 2: Supplementary tables

**Table S1** Rank of pancreatic cancer ASDR in Western Pacific countries for both sex, 1990 and 2019

| Country                          | ASDR in 1990 | Rank | ASDR in 2019 | Rank |
|----------------------------------|--------------|------|--------------|------|
| Japan                            | 9.17         | 1    | 9.60         | 2    |
| Palau                            | 8.38         | 2    | 11.95        | 1    |
| Republic of Korea                | 7.74         | 3    | 8.25         | 5    |
| Australia                        | 7.55         | 4    | 8.26         | 4    |
| New Zealand                      | 7.16         | 5    | 7.46         | 7    |
| Brunei Darussalam                | 6.62         | 6    | 9.30         | 3    |
| Singapore                        | 5.44         | 7    | 5.59         | 12   |
| Nauru                            | 4.35         | 8    | 6.08         | 10   |
| Guam                             | 4.28         | 9    | 5.26         | 14   |
| Samoa                            | 4.26         | 10   | 4.40         | 21   |
| Niue                             | 3.87         | 11   | 6.40         | 8    |
| Cook Islands                     | 3.80         | 12   | 4.95         | 16   |
| Northern Mariana Islands         | 3.55         | 13   | 5.59         | 6    |
| Philippines                      | 3.39         | 14   | 4.41         | 20   |
| China                            | 3.34         | 15   | 5.99         | 11   |
| American Samoa                   | 3.26         | 16   | 5.19         | 15   |
| Micronesia (Federated States of) | 3.24         | 17   | 5.31         | 13   |
| Mongolia                         | 3.23         | 18   | 6.28         | 9    |
| Tonga                            | 2.96         | 19   | 4.49         | 18   |
| Fiji                             | 2.74         | 20   | 4.34         | 22   |

|                                  |      |    |      |    |
|----------------------------------|------|----|------|----|
| Tokelau                          | 2.65 | 21 | 4.46 | 19 |
| Tuvalu                           | 2.62 | 22 | 4.02 | 23 |
| Marshall Islands                 | 2.42 | 23 | 4.01 | 24 |
| Lao People's Democratic Republic | 2.40 | 24 | 3.52 | 27 |
| Kiribati                         | 2.37 | 25 | 3.00 | 30 |
| Cambodia                         | 2.23 | 26 | 3.75 | 26 |
| Malaysia                         | 1.95 | 27 | 3.80 | 25 |
| Vanuatu                          | 1.91 | 28 | 3.11 | 28 |
| Solomon Islands                  | 1.87 | 29 | 3.07 | 29 |
| Viet Nam                         | 1.82 | 30 | 4.53 | 17 |
| Papua New Guinea                 | 1.26 | 31 | 1.81 | 31 |

---

ASDR: age-standardized rate

**Table S2** Rank of pancreatic cancer ASDR in Western Pacific countries in male, 1990 and 2019

| Country                          | ASDR in 1990 | Rank | ASDR in 2019 | Rank |
|----------------------------------|--------------|------|--------------|------|
| Japan                            | 11.75        | 1    | 11.55        | 1    |
| Republic of Korea                | 10.80        | 2    | 9.91         | 3    |
| Australia                        | 8.84         | 3    | 9.36         | 4    |
| New Zealand                      | 8.51         | 4    | 8.02         | 6    |
| Brunei Darussalam                | 8.16         | 5    | 10.40        | 2    |
| Singapore                        | 6.73         | 6    | 6.08         | 14   |
| Samoa                            | 5.34         | 7    | 5.17         | 18   |
| Cook Islands                     | 5.24         | 8    | 6.65         | 12   |
| Nauru                            | 4.79         | 9    | 7.00         | 10   |
| Guam                             | 4.65         | 10   | 6.07         | 15   |
| Niue                             | 4.26         | 11   | 7.31         | 9    |
| American Samoa                   | 4.21         | 12   | 6.78         | 11   |
| China                            | 4.12         | 13   | 7.69         | 7    |
| Tonga                            | 4.02         | 14   | 6.43         | 13   |
| Mongolia                         | 3.88         | 15   | 8.4          | 5    |
| Micronesia (Federated States of) | 3.67         | 16   | 5.87         | 16   |
| Fiji                             | 3.62         | 17   | 5.68         | 17   |
| Philippines                      | 3.62         | 18   | 4.72         | 20   |
| Northern Mariana Islands         | 3.44         | 19   | 7.64         | 8    |
| Lao People's Democratic Republic | 3.00         | 20   | 3.74         | 27   |
| Cambodia                         | 2.98         | 21   | 4.43         | 21   |
| Tuvalu                           | 2.97         | 22   | 4.33         | 22   |
| Marshall Islands                 | 2.91         | 23   | 4.32         | 23   |
| Kiribati                         | 2.58         | 24   | 3.22         | 30   |

|                  |      |    |      |    |
|------------------|------|----|------|----|
| Tokelau          | 2.43 | 25 | 4.12 | 25 |
| Palau            | 2.41 | 26 | 3.83 | 26 |
| Solomon Islands  | 2.28 | 27 | 3.66 | 28 |
| Malaysia         | 2.23 | 28 | 4.15 | 24 |
| Vanuatu          | 2.19 | 29 | 3.55 | 29 |
| Viet Nam         | 2.07 | 30 | 4.87 | 19 |
| Papua New Guinea | 1.52 | 31 | 2.11 | 31 |

---

ASDR: age-standardized rate

**Table S3** Rank of pancreatic cancer ASDR in Western Pacific countries in female, 2019

| Country                          | ASDR in 2019 | Rank | ASDR in 2019 | Rank |
|----------------------------------|--------------|------|--------------|------|
| Palau                            | 13.91        | 1    | 19.34        | 1    |
| Japan                            | 7.18         | 2    | 7.85         | 3    |
| Australia                        | 6.47         | 3    | 7.24         | 5    |
| New Zealand                      | 6.07         | 4    | 6.95         | 6    |
| Republic of Korea                | 5.71         | 5    | 6.84         | 7    |
| Brunei Darussalam                | 5.55         | 6    | 8.88         | 2    |
| Singapore                        | 4.43         | 7    | 5.14         | 10   |
| Nauru                            | 3.89         | 8    | 5.30         | 9    |
| Guam                             | 3.85         | 9    | 4.45         | 15   |
| Northern Mariana Islands         | 3.64         | 10   | 7.85         | 4    |
| Niue                             | 3.53         | 11   | 5.60         | 8    |
| Samoa                            | 3.25         | 12   | 3.66         | 21   |
| Philippines                      | 3.17         | 13   | 4.09         | 17   |
| Tokelau                          | 2.82         | 14   | 4.77         | 13   |
| Micronesia (Federated States of) | 2.81         | 15   | 4.78         | 12   |
| Mongolia                         | 2.76         | 16   | 4.79         | 11   |
| China                            | 2.70         | 17   | 4.58         | 14   |
| Tuvalu                           | 2.35         | 18   | 3.73         | 18   |
| American Samoa                   | 2.30         | 19   | 3.70         | 19   |
| Cook Islands                     | 2.23         | 20   | 3.37         | 23   |
| Kiribati                         | 2.21         | 21   | 2.86         | 27   |
| Marshall Islands                 | 1.96         | 22   | 3.70         | 20   |
| Tonga                            | 1.95         | 23   | 2.83         | 28   |
| Fiji                             | 1.89         | 24   | 3.27         | 26   |

|                                  |      |    |      |    |
|----------------------------------|------|----|------|----|
| Lao People's Democratic Republic | 1.88 | 25 | 3.32 | 24 |
| Malaysia                         | 1.69 | 26 | 3.44 | 22 |
| Cambodia                         | 1.68 | 27 | 3.27 | 25 |
| Viet Nam                         | 1.63 | 28 | 4.23 | 16 |
| Vanuatu                          | 1.57 | 29 | 2.63 | 29 |
| Solomon Islands                  | 1.34 | 30 | 2.45 | 30 |
| Papua New Guinea                 | 1.00 | 31 | 1.48 | 31 |

---

ASDR: age-standardized rate

**Table S4** The deaths and ASDR of pancreatic cancer attributable to smoking in Western Pacific countries/territories in 1990 and 2019.

| Location                         | Deaths in 1990   | ASDR in 1990     | Deaths in 2019      | ASDR in 2019     |
|----------------------------------|------------------|------------------|---------------------|------------------|
| American Samoa                   | 0 (0-0)          | 0.73 (0.55-0.93) | 0 (0-1)             | 1.05 (0.81-1.35) |
| Australia                        | 432 (376-487)    | 2.18 (1.89-2.46) | 615 (514-734)       | 1.47 (1.24-1.74) |
| Brunei Darussalam                | 1 (1-2)          | 1.78 (1.41-2.24) | 4 (3-5)             | 1.63 (1.26-2.03) |
| Cambodia                         | 23 (15-33)       | 0.58 (0.38-0.81) | 86 (65-106)         | 0.81 (0.62-0.97) |
| China                            | 5529 (4381-6837) | 0.69 (0.56-0.84) | 26552 (20856-33174) | 1.34 (1.05-1.65) |
| Cook Islands                     | 0 (0-0)          | 0.8 (0.59-1.06)  | 0 (0-0)             | 0.91 (0.68-1.19) |
| Fiji                             | 2 (2-3)          | 0.67 (0.5-0.86)  | 5 (3-7)             | 0.7 (0.5-0.98)   |
| Guam                             | 1 (0-1)          | 0.74 (0.55-0.95) | 2 (1-2)             | 0.9 (0.68-1.18)  |
| Japan                            | 4759 (4200-5379) | 2.78 (2.45-3.14) | 7434 (6196-8628)    | 2.04 (1.75-2.34) |
| Kiribati                         | 0 (0-0)          | 0.74 (0.58-0.92) | 1 (0-1)             | 1.01 (0.75-1.33) |
| Lao People's Democratic Republic | 12 (7-18)        | 0.59 (0.38-0.9)  | 26 (19-35)          | 0.67 (0.49-0.87) |
| Malaysia                         | 30 (23-38)       | 0.36 (0.28-0.45) | 145 (104-199)       | 0.59 (0.42-0.78) |
| Marshall Islands                 | 0 (0-0)          | 0.36 (0.26-0.47) | 0 (0-0)             | 0.55 (0.39-0.76) |
| Micronesia (Federated States of) | 0 (0-0)          | 0.8 (0.58-1.06)  | 1 (1-1)             | 1.26 (0.81-1.73) |
| Mongolia                         | 5 (4-7)          | 0.52 (0.38-0.66) | 24 (17-32)          | 1.08 (0.8-1.42)  |
| Nauru                            | 0 (0-0)          | 1.04 (0.73-1.44) | 0 (0-0)             | 1.41 (0.92-1.98) |
| New Zealand                      | 90 (78-103)      | 2.26 (1.95-2.58) | 124 (103-149)       | 1.55 (1.29-1.86) |
| Niue                             | 0 (0-0)          | 0.69 (0.49-0.93) | 0 (0-0)             | 1.03 (0.73-1.43) |
| Northern Mariana Islands         | 0 (0-0)          | 0.73 (0.56-0.95) | 1 (1-1)             | 1.34 (1.01-1.69) |
| Palau                            | 0 (0-0)          | 1.11 (0.76-1.58) | 0 (0-0)             | 1.36 (0.93-1.89) |
| Papua New Guinea                 | 4 (2-7)          | 0.24 (0.14-0.38) | 13 (8-20)           | 0.29 (0.18-0.44) |
| Philippines                      | 224 (180-271)    | 0.83 (0.68-0.99) | 689 (525-882)       | 0.97 (0.76-1.23) |
| Republic of Korea                | 581 (502-661)    | 2.02 (1.73-2.31) | 1510 (1249-1784)    | 1.7 (1.4-2.01)   |
| Samoa                            | 1 (1-1)          | 1.08 (0.86-1.35) | 2 (1-2)             | 1.09 (0.83-1.47) |

|                        |                     |                  |                     |                  |
|------------------------|---------------------|------------------|---------------------|------------------|
| Singapore              | 23 (19-27)          | 1.09 (0.91-1.29) | 59 (49-70)          | 0.76 (0.63-0.91) |
| Solomon Islands        | 1 (0-1)             | 0.46 (0.31-0.65) | 2 (1-3)             | 0.67 (0.46-0.92) |
| Tokelau                | 0 (0-0)             | 0.51 (0.35-0.7)  | 0 (0-0)             | 0.78 (0.51-1.08) |
| Tonga                  | 0 (0-1)             | 0.77 (0.54-1.03) | 1 (1-1)             | 1.02 (0.7-1.41)  |
| Tuvalu                 | 0 (0-0)             | 0.56 (0.41-0.73) | 0 (0-0)             | 0.79 (0.55-1.1)  |
| Vanuatu                | 0 (0-0)             | 0.32 (0.22-0.46) | 1 (0-1)             | 0.4 (0.27-0.55)  |
| Viet Nam               | 115 (84-149)        | 0.29 (0.22-0.38) | 606 (439-822)       | 0.69 (0.51-0.93) |
| Western Pacific Region | 11945 (10400-13605) | 1.1 (0.97-1.25)  | 38359 (31806-45750) | 1.42 (1.18-1.67) |

ASDR: age-standardized death rate.



**Table S5** The deaths and ASDR of pancreatic cancer attributable to high fasting plasma glucose in Western Pacific countries/territories in 1990 and 2019.

| Location                         | Deaths in 1990  | ASDR in 1990     | Deaths in 2019    | ASDR in 2019     |
|----------------------------------|-----------------|------------------|-------------------|------------------|
| American Samoa                   | 0 (0-0)         | 0.51 (0.12-1.06) | 0 (0-1)           | 1.1 (0.29-2.23)  |
| Australia                        | 74 (17-166)     | 0.38 (0.09-0.85) | 294 (66-649)      | 0.65 (0.15-1.44) |
| Brunei Darussalam                | 1 (0-2)         | 1.18 (0.3-2.41)  | 4 (1-8)           | 1.77 (0.44-3.57) |
| Cambodia                         | 4 (1-9)         | 0.1 (0.02-0.24)  | 39 (9-85)         | 0.38 (0.09-0.82) |
| China                            | 1523 (323-3532) | 0.2 (0.04-0.46)  | 8046 (1759-18320) | 0.41 (0.09-0.94) |
| Cook Islands                     | 0 (0-0)         | 0.4 (0.09-0.88)  | 0 (0-0)           | 0.8 (0.19-1.68)  |
| Fiji                             | 1 (0-2)         | 0.37 (0.09-0.81) | 6 (1-12)          | 0.88 (0.23-1.8)  |
| Guam                             | 0 (0-0)         | 0.35 (0.08-0.79) | 1 (0-2)           | 0.56 (0.13-1.22) |
| Japan                            | 931 (205-2079)  | 0.55 (0.12-1.24) | 2628 (581-5869)   | 0.64 (0.14-1.43) |
| Kiribati                         | 0 (0-0)         | 0.23 (0.05-0.51) | 0 (0-1)           | 0.45 (0.11-1)    |
| Lao People's Democratic Republic | 3 (1-7)         | 0.15 (0.03-0.39) | 14 (3-31)         | 0.39 (0.09-0.84) |
| Malaysia                         | 13 (3-28)       | 0.16 (0.03-0.36) | 105 (25-233)      | 0.45 (0.11-0.98) |
| Marshall Islands                 | 0 (0-0)         | 0.34 (0.08-0.74) | 0 (0-1)           | 0.81 (0.21-1.72) |
| Micronesia (Federated States of) | 0 (0-0)         | 0.26 (0.06-0.59) | 0 (0-1)           | 0.79 (0.2-1.74)  |
| Mongolia                         | 1 (0-2)         | 0.08 (0.02-0.19) | 5 (1-11)          | 0.24 (0.05-0.57) |
| Nauru                            | 0 (0-0)         | 0.38 (0.08-0.86) | 0 (0-0)           | 0.84 (0.19-1.91) |
| New Zealand                      | 13 (3-28)       | 0.32 (0.07-0.71) | 44 (10-96)        | 0.52 (0.12-1.15) |
| Niue                             | 0 (0-0)         | 0.47 (0.11-1.03) | 0 (0-0)           | 1.21 (0.3-2.58)  |
| Northern Mariana Islands         | 0 (0-0)         | 0.32 (0.07-0.71) | 0 (0-1)           | 1.07 (0.27-2.23) |
| Palau                            | 0 (0-0)         | 0.87 (0.17-2.02) | 0 (0-1)           | 1.96 (0.43-4.36) |
| Papua New Guinea                 | 2 (0-5)         | 0.11 (0.02-0.29) | 9 (2-23)          | 0.23 (0.05-0.56) |
| Philippines                      | 56 (13-126)     | 0.23 (0.05-0.51) | 238 (53-524)      | 0.36 (0.08-0.78) |
| Republic of Korea                | 134 (29-298)    | 0.5 (0.11-1.1)   | 657 (150-1434)    | 0.74 (0.17-1.61) |
| Samoa                            | 0 (0-1)         | 0.41 (0.09-0.94) | 1 (0-2)           | 0.63 (0.15-1.38) |

|                        |                 |                  |                    |                  |
|------------------------|-----------------|------------------|--------------------|------------------|
| Singapore              | 10 (2-22)       | 0.51 (0.12-1.1)  | 40 (9-88)          | 0.53 (0.12-1.18) |
| Solomon Islands        | 0 (0-0)         | 0.13 (0.03-0.33) | 1 (0-3)            | 0.39 (0.09-0.89) |
| Tokelau                | 0 (0-0)         | 0.24 (0.06-0.55) | 0 (0-0)            | 0.64 (0.15-1.43) |
| Tonga                  | 0 (0-0)         | 0.28 (0.06-0.65) | 0 (0-1)            | 0.63 (0.14-1.4)  |
| Tuvalu                 | 0 (0-0)         | 0.23 (0.05-0.53) | 0 (0-0)            | 0.59 (0.13-1.33) |
| Vanuatu                | 0 (0-0)         | 0.16 (0.03-0.38) | 1 (0-2)            | 0.42 (0.1-0.97)  |
| Viet Nam               | 37 (8-86)       | 0.1 (0.02-0.23)  | 344 (81-776)       | 0.43 (0.1-0.97)  |
| Western Pacific Region | 2828 (610-6322) | 0.27 (0.06-0.61) | 12738 (2881-28589) | 0.48 (0.11-1.08) |

---

ASDR: age-standardized death rate.

**Table S6** The deaths and ASDR of pancreatic cancer attributable to high body-mass index in Western Pacific countries/territories in 1990 and 2019.

| Location                         | Deaths in 1990 | ASDR in 1990     | Deaths in 2019   | ASDR in 2019     |
|----------------------------------|----------------|------------------|------------------|------------------|
| American Samoa                   | 0 (0-0)        | 0.28 (0.09-0.53) | 0 (0-0)          | 0.48 (0.16-0.91) |
| Australia                        | 94 (34-178)    | 0.48 (0.17-0.91) | 300 (115-537)    | 0.71 (0.27-1.26) |
| Brunei Darussalam                | 0 (0-0)        | 0.14 (0.03-0.37) | 1 (0-2)          | 0.37 (0.12-0.76) |
| Cambodia                         | 1 (0-3)        | 0.02 (0-0.06)    | 10 (3-22)        | 0.09 (0.03-0.19) |
| China                            | 456 (78-1231)  | 0.06 (0.01-0.15) | 4236 (1108-9602) | 0.21 (0.06-0.48) |
| Cook Islands                     | 0 (0-0)        | 0.26 (0.07-0.54) | 0 (0-0)          | 0.45 (0.13-0.86) |
| Fiji                             | 1 (0-1)        | 0.15 (0.05-0.32) | 2 (1-5)          | 0.34 (0.12-0.65) |
| Guam                             | 0 (0-0)        | 0.29 (0.1-0.57)  | 1 (0-2)          | 0.45 (0.16-0.85) |
| Japan                            | 392 (91-936)   | 0.23 (0.05-0.56) | 1025 (252-2417)  | 0.27 (0.07-0.63) |
| Kiribati                         | 0 (0-0)        | 0.12 (0.04-0.24) | 0 (0-0)          | 0.16 (0.05-0.33) |
| Lao People's Democratic Republic | 1 (0-2)        | 0.03 (0.01-0.07) | 5 (1-10)         | 0.11 (0.03-0.23) |
| Malaysia                         | 5 (2-11)       | 0.06 (0.02-0.12) | 52 (19-105)      | 0.2 (0.07-0.4)   |
| Marshall Islands                 | 0 (0-0)        | 0.09 (0.02-0.2)  | 0 (0-0)          | 0.2 (0.06-0.42)  |
| Micronesia (Federated States of) | 0 (0-0)        | 0.18 (0.06-0.37) | 0 (0-1)          | 0.35 (0.13-0.69) |
| Mongolia                         | 2 (1-3)        | 0.15 (0.05-0.3)  | 9 (3-17)         | 0.38 (0.12-0.73) |
| Nauru                            | 0 (0-0)        | 0.27 (0.09-0.56) | 0 (0-0)          | 0.41 (0.13-0.83) |
| New Zealand                      | 17 (6-32)      | 0.42 (0.15-0.82) | 47 (17-85)       | 0.59 (0.21-1.08) |
| Niue                             | 0 (0-0)        | 0.25 (0.09-0.47) | 0 (0-0)          | 0.52 (0.18-1.01) |
| Northern Mariana Islands         | 0 (0-0)        | 0.32 (0.12-0.59) | 0 (0-1)          | 0.69 (0.26-1.27) |
| Palau                            | 0 (0-0)        | 0.65 (0.23-1.21) | 0 (0-0)          | 1.06 (0.4-1.93)  |
| Papua New Guinea                 | 1 (0-2)        | 0.03 (0.01-0.09) | 3 (1-7)          | 0.05 (0.01-0.14) |
| Philippines                      | 22 (6-48)      | 0.07 (0.02-0.16) | 126 (42-252)     | 0.17 (0.06-0.33) |
| Republic of Korea                | 58 (14-141)    | 0.2 (0.05-0.49)  | 270 (78-587)     | 0.3 (0.09-0.66)  |
| Samoa                            | 0 (0-1)        | 0.3 (0.1-0.58)   | 0 (0-1)          | 0.32 (0.1-0.63)  |

|                        |                 |                  |                   |                  |
|------------------------|-----------------|------------------|-------------------|------------------|
| Singapore              | 3 (1-7)         | 0.13 (0.03-0.32) | 19 (6-38)         | 0.24 (0.08-0.49) |
| Solomon Islands        | 0 (0-0)         | 0.06 (0.01-0.15) | 0 (0-1)           | 0.14 (0.04-0.31) |
| Tokelau                | 0 (0-0)         | 0.13 (0.04-0.26) | 0 (0-0)           | 0.3 (0.11-0.59)  |
| Tonga                  | 0 (0-0)         | 0.17 (0.05-0.36) | 0 (0-1)           | 0.32 (0.09-0.66) |
| Tuvalu                 | 0 (0-0)         | 0.1 (0.03-0.23)  | 0 (0-0)           | 0.22 (0.07-0.45) |
| Vanuatu                | 0 (0-0)         | 0.07 (0.02-0.17) | 0 (0-1)           | 0.16 (0.05-0.34) |
| Viet Nam               | 6 (1-17)        | 0.01 (0-0.04)    | 94 (28-206)       | 0.11 (0.03-0.23) |
| Western Pacific Region | 1067 (244-2636) | 0.1 (0.02-0.24)  | 6312 (1813-14033) | 0.23 (0.07-0.52) |

---

ASDR: age-standardized death rate.

**Table S7** Local drifts of pancreatic cancer in Western Pacific region for both sexes combined, 1990 to 2019

| Age  | Percent per year | Lower 95% CI | Upper 95% CI |
|------|------------------|--------------|--------------|
| 17.5 | 0.04             | -2.04        | 2.15         |
| 22.5 | 0.37             | -0.75        | 1.51         |
| 27.5 | 0.74             | 0.07         | 1.41         |
| 32.5 | 1.04             | 0.61         | 1.47         |
| 37.5 | 1.06             | 0.75         | 1.36         |
| 42.5 | 1.02             | 0.80         | 1.24         |
| 47.5 | 0.95             | 0.79         | 1.12         |
| 52.5 | 1.02             | 0.88         | 1.15         |
| 57.5 | 1.09             | 0.97         | 1.20         |
| 62.5 | 1.25             | 1.15         | 1.35         |
| 67.5 | 1.45             | 1.35         | 1.54         |
| 72.5 | 1.59             | 1.50         | 1.69         |
| 77.5 | 1.66             | 1.55         | 1.76         |
| 82.5 | 1.71             | 1.57         | 1.85         |
| 87.5 | 1.84             | 1.64         | 2.05         |
| 92.5 | 2.03             | 1.64         | 2.42         |
| 97.5 | 2.79             | 1.83         | 3.76         |

CI: confidence interval.

**Table S8** Local drifts of pancreatic cancer in Western Pacific region for males, 1990 to 2019

| Age  | Percent per year | Lower 95% CI | Upper 95% CI |
|------|------------------|--------------|--------------|
| 17.5 | 0.89             | -1.57        | 3.42         |
| 22.5 | 1.33             | -0.06        | 2.73         |
| 27.5 | 1.69             | 0.87         | 2.52         |
| 32.5 | 1.83             | 1.32         | 2.35         |
| 37.5 | 1.64             | 1.28         | 1.99         |
| 42.5 | 1.50             | 1.24         | 1.76         |
| 47.5 | 1.35             | 1.15         | 1.54         |
| 52.5 | 1.33             | 1.17         | 1.50         |
| 57.5 | 1.32             | 1.17         | 1.46         |
| 62.5 | 1.42             | 1.29         | 1.55         |
| 67.5 | 1.57             | 1.45         | 1.70         |
| 72.5 | 1.69             | 1.56         | 1.82         |
| 77.5 | 1.70             | 1.55         | 1.85         |
| 82.5 | 1.73             | 1.53         | 1.93         |
| 87.5 | 1.85             | 1.52         | 2.18         |
| 92.5 | 1.83             | 1.14         | 2.53         |
| 97.5 | 2.12             | 0.87         | 3.42         |

CI: confidence interval.

**Table S9** Local drifts of pancreatic cancer in Western Pacific region for females, 1990 to 2019

| Age  | Percent per year | Lower 95% CI | Upper 95% CI |
|------|------------------|--------------|--------------|
| 17.5 | -1.03            | -3.74        | 1.74         |
| 22.5 | -1.09            | -2.5         | 0.34         |
| 27.5 | -0.94            | -1.79        | -0.09        |
| 32.5 | -0.59            | -1.18        | 0.00         |
| 37.5 | -0.23            | -0.66        | 0.20         |
| 42.5 | 0.00             | -0.31        | 0.30         |
| 47.5 | 0.20             | -0.02        | 0.43         |
| 52.5 | 0.50             | 0.33         | 0.68         |
| 57.5 | 0.76             | 0.61         | 0.91         |
| 62.5 | 1.02             | 0.89         | 1.14         |
| 67.5 | 1.25             | 1.13         | 1.36         |
| 72.5 | 1.38             | 1.27         | 1.49         |
| 77.5 | 1.49             | 1.37         | 1.61         |
| 82.5 | 1.59             | 1.45         | 1.73         |
| 87.5 | 1.79             | 1.59         | 2.00         |
| 92.5 | 2.11             | 1.75         | 2.48         |
| 97.5 | 3.04             | 2.17         | 3.92         |

CI: confidence interval.

**Table S10** Net drift of pancreatic cancer in Western Pacific region, 1990 to 2019

| Net Drift (%/year) | Lower 95% CI | Upper 95% CI | Group  |
|--------------------|--------------|--------------|--------|
| 1.255              | 1.3          | 1.38         | Both   |
| 1.553              | 1.394        | 1.712        | Male   |
| 0.663              | 0.502        | 0.825        | Female |

CI: confidence interval.
